# Supplementary material for: Isolation and identification of pathogenic fungi and oomycetes associated with beans and cowpea root diseases in Oman
Source: PeerJ. 2018 Dec 13;6:e6064. doi: 10.7717/peerj.6064 (PMC6295327; doi:10.7717/peerj.6064)
Supplement: Data S1 [file peerj-06-6064-s001.xlsx]

## Sheet: Sheet1
			Fresh weight	Dry weight	Stem length
Phaseolus vulgaris	Control	T1	1.99	0.29	4.92
	Control	T2	3.17	0.32	4.78
	Pythium aphanidermatum	T1	1.14	0.24	0.64
	Pythium aphanidermatum	T2	1.09	0.17	2.46
	Fusarium equiseti	T1	2.75	0.4	4.82
	Fusarium equiseti	T2	3.11	0.39	6.32
Vigna unquiculata	Control	T1	4.19	0.43	13.08
	Control	T2	2.13	0.23	6.3
	Curvularia lunata	T1	4.34	0.47	8.22
	Curvularia lunata	T2	2.2	0.22	9.78
	Curvularia hawaiiensis	T1	1.23	0.14	12.46
	Curvularia hawaiiensis	T2	1.41	0.17	7.1
	Rhizoctonia solani	T1	3.34	0.34	12.5
	Rhizoctonia solani	T2	1.49	0.22	6.04
Vigna radiata	Control	T1	0.74	0.06	10.36
	Control	T2	0.37	0.04	5.42
	Curvularia lunata	T1	0.67	0.14	13.84
	Curvularia lunata	T2	0.29	0.03	5.24
	Alternaria alternata	T1	0.94	0.08	12.54
	Alternaria alternata	T2	0.86	0.11	4.22
Vicia faba L.	Control	T1	1.49	0.18	12.24
	Control	T2	1.51	0.17	9.24
	Pythium spinosum	T1	1.43	0.19	11.66
	Pythium spinosum	T2	1.14	0.14	6.2
	Alternaria alternata	T1	1.45	0.19	13.46
	Alternaria alternata	T2	1.3	0.22	7.2
